## Angioscopic findings one year after percutaneous coronary intervention for chronic total occlusion

I.F. Fukuizumi, Y.T. Tokita, K.M. Mozawa, N.S. Sasamoto, T.S. Seki, M.W. Wakita, R.S. Shiomura, S.N. Noma, J.M. Matsuda, Y.K. Kubota, J.N. Nakata, S.T. Tara, T.Y. Yamamoto, H.T. Takano, W.S. Shimizu

*Nippon Medical School Teaching Hospital, Department of Cardiovascular Medicine, Tokyo, Japan*

**Funding Acknowledgement:** Type of funding source: None

**Background:** Chronic total occlusion (CTO) is thought as a high-risk feature of stent thrombosis, but little is known about the difference in neointimal healing of stents implanted for CTO lesions compared to that of non-CTO lesions.

**Methods and results:** A total of 62 stents in consecutive 47 patients (69±11 years, 41 male) who underwent follow-up angiography and angioscopy one year after percutaneous coronary intervention (PCI) between March 2016 and July 2019 were evaluated. The examined stents were divided into 3 groups according to the lesion status at previous PCI: CTO group (n=12), stable coronary artery disease without CTO (non-CTO group, n=30) and acute coronary syndrome (ACS group, n=20). The grade

of neointimal stent coverage in CTO group was significantly lower than that of non-CTO group ( $0.5 \pm 0.5$  vs  $1.4 \pm 0.9$ ,  $p=0.001$ ). The frequency of presence of thrombus was significantly higher in CTO group and ACS group compared to non-CTO group (67%, 50%, and 13%, respectively,  $p=0.001$ ). The yellow grade in CTO group was equivalent ( $p=1.00$ ) to that in ACS group and was tended to be higher ( $p=0.051$ ) compared to non-CTO group ( $1.3 \pm 0.8$ ,  $1.5 \pm 0.6$ , and  $0.8 \pm 0.7$ , respectively).

**Conclusion:** The present study suggested a delayed healing in stents implanted for CTO lesions. Longer dual-antithrombotic therapy maybe beneficial for these patients.
